# Supplementary material for: Transcriptomic and Metabolomic Research on the Germination Process of Panax ginseng Overwintering Buds
Source: MDPI journal article supplement (doi:10.3390/plants13071041), 2024-04-08
Supplement: s1 [file s1]

**Table S1** Primers used in the experiment

| Gene ID        | Forward primer (5'→3') | Reverse primer (5'→3') |
|----------------|------------------------|------------------------|
| EVM0001137     | CGTACAACTGGTATCGTGCTG  | CAGCAGTGGTGGTGAACAT    |
| EVM0002701     | ATGAAGGAAAGATTGGTTGG   | AAACTTGCTCTTAGTGACAG   |
| EVM0003588     | AACCCTATTTCTCGGATCAGGT | TCAGCAAATGGATCGAAAGC   |
| EVM0004731     | ACCGAAGTCTCTGATAGTGTA  | TAATCTCAGTGTAACCGGTG   |
| EVM0005219     | CTGTCACTAAGAGCAAGTTTGA | GCCCTTTCCGACATCTCCGTAA |
| EVM0007067     | GACGATGATTGCTTTGTTGC   | GGACGAAATCTGTACCATCT   |
| EVM0007078     | ATACTGTTGTTGAGCCCT     | GAGATCACCAAAGCTAGG     |
| EVM0009275     | AAGGGCAAAGGTTCCAAG     | TACCCTTACAGTCATTGC     |
| EVM0014402     | TCACCGTCAAGGATGCTAGA   | CTGTGCCAACTCTGTGTAGT   |
| EVM0020372     | AATGGTGAAGGCTGGTTTTG   | TCTCTTCGATTGGGCTTCAT   |
| EVM0021434     | AAGCCAAGGGTCAGCATC     | GAAGACAGGGAGGACATGAT   |
| EVM0022327     | GCGAAGCCAGCCAATTCAAC   | GTCGCCTATGGTGTGTGAAA   |
| <i>PgGAPDH</i> | CACGGTCCCTGGAAGCA      | CATTGACACCCACAACAAACAT |
